# Supplementary material for: N-Doped carbon nanoparticles on highly porous carbon nanofiber electrodes for sodium ion batteries
Source: Royal Society of Chemistry journal article supplement (doi:10.1039/d3ra00635b), 2023-01-01
Supplement: d3ra00635b1.pdf [file d3ra00635b1.pdf]

# **N-doped carbon nanoparticles on highly porous carbon nanofiber electrodes for sodium ion batteries**

**Meltem Yanilmaz<sup>1,2\*</sup>, Bülin Atıcı<sup>1</sup>, Jiadeng Zhu<sup>3</sup>, Ozan Toprakci<sup>4</sup>, Juran Kim<sup>5\*</sup>**

<sup>1</sup> Nano-Science and Nano-Engineering Program, Graduate School of Science, Engineering and  
Technology, Istanbul Technical University, Istanbul 34469, Turkey

<sup>2</sup> Textile Engineering, Istanbul Technical University, Istanbul 34469, Turkey

<sup>3</sup> Oak Ridge National Laboratory, Chemical Sciences Division, Oak Ridge, TN 37831, USA

<sup>4</sup> Yalova University, Department of Polymer Materials Engineering, 77200 Yalova, Turkey

<sup>5</sup> Advanced Textile R&D Department, Korea Institute of Industrial Technology (KITECH),  
Ansan 15588, Korea

**Table S1** Capacity and CE values

| Electrodes | First cycle Capacity, mAh/g | Initial Coulombic efficiency, % | Capacity retention, % |
|------------|-----------------------------|---------------------------------|-----------------------|
| CNF        | 197                         | 48                              | 90                    |
| PCNF1      | 283                         | 48                              | 93                    |
| PCNF2      | 350                         | 54                              | 94                    |
| PCNF3      | 325                         | 54                              | 87                    |
| N-PCNF4    | 402                         | 66                              | 97                    |
| N-PCNF5    | 392                         | 54                              | 97                    |

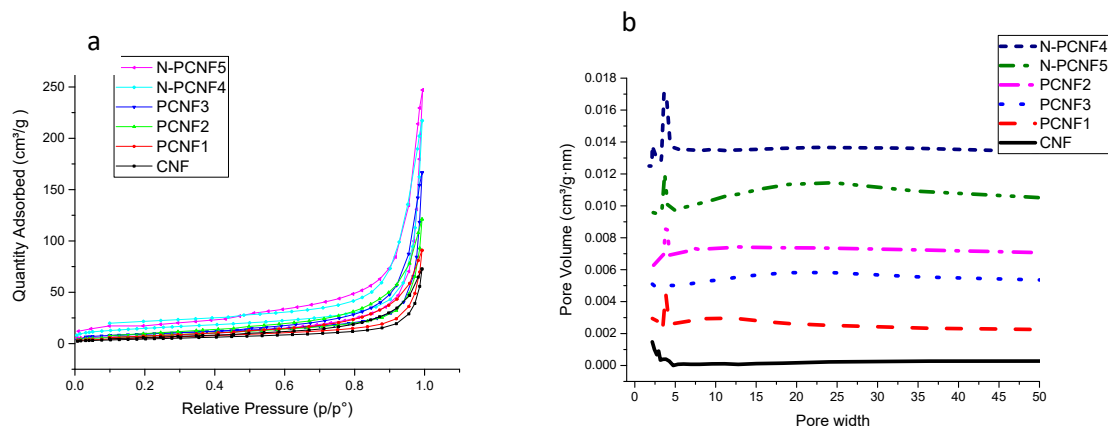

**Figure S1**  $N_2$  adsorption/desorption isotherms (a), and pore size distributions (b).

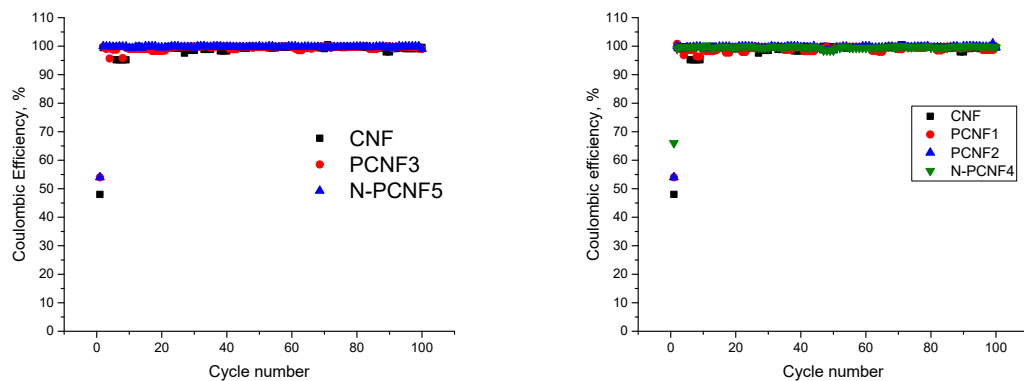

**Figure S2** Coulombic Efficiencies of of CNF, PCNF1, PCNF2, PCNF3, N-PCNF4 and N-PCNF5 electrodes.
